# Supplementary material for: pH-tunable gradients of wettability and surface potential
Source: Royal Society of Chemistry journal article supplement (doi:10.1039/c2sm25221j), 2012-01-01
Supplement: c2sm25221j.pdf [file c2sm25221j.pdf]

## Supporting Information

### pH-tunable gradients of wettability and surface potential

Agnieszka Mierczynska <sup>\*a</sup>, Andrew Michelmore <sup>b</sup>, Abhishek Tripathi <sup>b</sup>, Renee V. Goreham <sup>b</sup>,  
Rossen Sedev <sup>a</sup>, and Krasimir Vasilev <sup>\*b,c</sup>

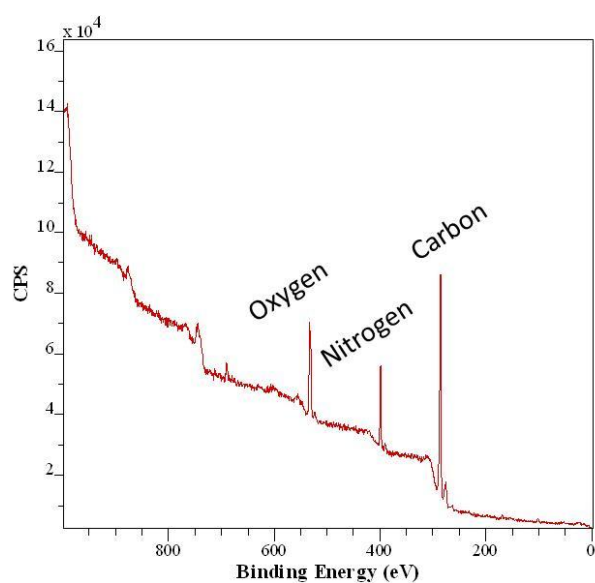

Figure S1. Typical XPS survey spectrum of an AApp coating
